# Supplementary material
Source: PubMed Central journal article supplement (PMC3347393)
Supplement: supp_86.9.5253_TableS1-S6_FigS1.pdf [file supp_86.9.5253_TableS1-S6_FigS1.pdf]

**Supplementary Table 1.** GenBank accessions and names of the *Mononegavirales* sequences used in this study.

| GenBank Accession                     | Name                 | GenBank Accession | Name                     |
|---------------------------------------|----------------------|-------------------|--------------------------|
| <b><i>Avulavirus</i></b>              |                      | EU167540          | SRZ03                    |
| <b><i>Newcastle disease virus</i></b> |                      | EU289028          | VG/GA                    |
| AB524405                              | Goose/Alaska/415/91  | EU289029          | VG/GA                    |
| AB524406                              | 9a5b                 | EU293914          | Italien                  |
| AB534205                              | 9a3b                 | EU546165          | JL-1                     |
| AF077761                              | LaSota               | FJ386392          | NDV01                    |
| AF309418                              | NDV-B1               | FJ386393          | NDV02                    |
| AF375823                              | B1-Takaaki           | FJ386394          | NDV03                    |
| AF431744                              | ZJ1                  | FJ386395          | NDV04                    |
| AY225110                              | HB92-V4              | FJ386396          | NDV05                    |
| AY562985                              | Cockatoo/14698/90    | FJ410145          | PPMV-1/NewYork/1984      |
| AY562986                              | Anhinga/FI/44083/93  | FJ430159          | JS/7/05/Ch               |
| AY562987                              | Gamefowl/211472/02   | FJ430160          | JS/9/05/Go               |
| AY562988                              | Chicken/1083/72      | FJ436302          | F48E8                    |
| AY562989                              | Dove/Italy/2736/00   | FJ436303          | ZJ/1/86/Ch               |
| AY562990                              | Mixedsp/US/Largo/71  | FJ436304          | JS/1/85/Ch               |
| AY562991                              | Chicken/Ulster/67    | FJ436305          | JS/1/97/Ch               |
| AY741404                              | Herts/33             | FJ436306          | JS/1/02/Du               |
| AY865652                              | Sterna/Astr/2755     | FJ751918          | QH1                      |
| AY935489                              | 01-1108              | FJ751919          | QH4                      |
| AY935490                              | 02-1334              | FJ766526          | JS/07/22/Pi              |
| AY935491                              | 98-154               | FJ766527          | JS/07/16/Pi              |
| AY935492                              | 98-1249              | FJ766528          | NDV05-029                |
| AY935493                              | 98-1252              | FJ766529          | ZhJ-3/97                 |
| AY935494                              | 99-0655              | FJ766530          | JS/07/04/Pi              |
| AY935495                              | 99-0868hi            | FJ766531          | JS/07/03/Pi              |
| AY935496                              | 99-0868lo            | FJ794269          | NDV08-004                |
| AY935497                              | 99-1997PR-32         | FJ872531          | Muscovy duck/FP1/02      |
| AY935498                              | 99-1435              | FJ939313          | NDV/Chicken/Egypt/1/2005 |
| AY935499                              | I-2                  | FJ986192          | 2K3/Chennai/TamilNadu    |
| AY935500                              | I-2Progenitor        | GQ288377          | Mallard/04-411           |
| DQ060053                              | AQI-ND026            | GQ288378          | Pintail/87-486           |
| DQ097393                              | DE-R49/99            | GQ288379          | Mallard/03-632           |
| DQ097394                              | PHY-LMV42            | GQ288380          | Mallard/86-233           |
| DQ485229                              | Chicken/Guangxi7/02  | GQ288381          | Cormorant/D9704285       |
| DQ485230                              | Chicken/Guangxi9/02  | GQ288382          | Cormorant/98CNN3-V1125   |
| DQ485231                              | Chicken/Guangxi11/02 | GQ288383          | Cormorant/95DC02150      |
| DQ486859                              | GM                   | GQ288384          | Cormorant/95DC2345       |
| DQ659677                              | NA-1                 | GQ288385          | Cormorant/18719-03       |
| EF026579                              | PPMV-1/0.025         | GQ288386          | Cormorant/19529-04       |
| EF026583                              | PPMV-1/1.3           | GQ288387          | Cormorant/92-40140       |

|           |                       |
|-----------|-----------------------|
| EF065682  | rAnhinga              |
| EF201805  | Mukteswar             |
| EU140955  | KBNP-C4152R2L         |
| GQ288392  | Mallard/MN00-39       |
| GQ338309  | ND/03/018             |
| GQ338310  | ND/03/044             |
| GQ338311  | ND/05/028             |
| GQ429293  | Dove/Italy/2736/00    |
| GQ849007  | JSD0812               |
| GQ918280  | BHG/Sweden/94         |
| GQ994433  | XD/Shandong/08        |
| GQ994434  | QG/Hebei/07           |
| GU143550  | Go/CH/HLJ/LL01/08     |
| GU187941  | NDV-2/chicken/Namakka |
| GU564399  | FMW                   |
| GU585905  | Chicken/Sweden/97     |
| GU978777  | APMV-1/US(TX)/GB      |
| HQ008337  | JS10                  |
| HM063422  | D3                    |
| HM063423  | W4                    |
| HM063424  | R8                    |
| HM063425  | P4                    |
| HM117720  | NDV-P05               |
| HM125898  | WDK/JX/7793/2004      |
| HM188399  | SDWF02                |
| HM357251  | NDV-4                 |
| NC_002617 | B1                    |

**Bornavirus**

***Borna disease virus***

|           |          |
|-----------|----------|
| AB032031  | OL/Hu-BV |
| AB246670  | Bo/04w   |
| AB258389  | huP2br   |
| AJ311521  | V/FR     |
| AJ311522  | He/80/FR |
| AJ311523  | H1766    |
| AJ311524  | No/98    |
| AY114161  | CRNP3A   |
| AY114162  | CRNP3B   |
| AY114163  | CRNP5    |
| NC_001607 | bobe     |
| U04608    | V        |

GQ288388  
GQ288389  
GQ288390

***Ebolavirus***  
***Ebola virus***

AB050936  
AF086833  
AF272001  
AF499101  
AF522874  
AY142960  
AY354458  
AY729654  
AY769362  
EU224440  
EU338380  
FJ217161  
FJ217162  
L11365  
NC\_004161  
NC\_006432  
NC\_014373  
NC\_002549

Cormorant/92-23071  
Mallard/99-376  
Mallard/00-32

Reston  
Mayinga  
Mayinga  
Mayinga  
Pennsylvania  
Mayinga  
Zaire  
Gulu  
Pennsylvania  
Mayinga  
Yambio  
Bundibugyo  
Cote d'Ivoire  
Zaire  
Pennsylvania  
Gulu  
Bundibugyo  
Mayinga

***Henipavirus***

***Nipah virus***

AF017149  
AF212302  
AJ564621  
AJ564622  
AJ564623  
AJ627196  
AY029767  
AY029768  
AY988601  
FJ513078  
NC\_001906  
NC\_002728

Hendra virus  
Nipah virus  
NV/MY/99/VRI-2794  
NV/MY/99/VRI-1413  
NV/MY/99/UM-0128  
NV/MY/99/VRI-0626  
UMMC1  
UMMC2  
Bangladesh  
Ind-Nipah-07-FG  
Hendra virus  
Nipah virus

***Lyssavirus***

***Rabies virus***

AB044824  
AB085828  
AB128149  
AB362483  
AF499686  
AY705373

Nishigahara  
HEP-Flury  
Ni-CE  
BR-Pfx1  
SRV9  
SHBRV-18

|          |                          |           |                      |
|----------|--------------------------|-----------|----------------------|
| DQ875050 | MRV                      | AY956319  | Serotype1            |
| DQ875051 | DRV                      | GU358653  | GX4                  |
| EF206707 | ERA                      | GU565703  | Flury-LEP            |
| EF206708 | SAD Lysvulpen            | GU565704  | Flury-HEP            |
| EF206709 | SAD B19                  | GU647092  | JX08-45              |
| EF206710 | SAD Bern var1            | M13215    | RAVMMGN              |
| EF206711 | SAD Bern var2            | M31046    | RAVCGA               |
| EF206712 | SAD Bern var3            | NC_001542 | RB                   |
| EF206713 | SAD Bern var4            |           |                      |
| EF206714 | SAD Bern var5            |           |                      |
| EF206715 | SAD P5/88                |           |                      |
| EF206716 | SAD VA1                  |           |                      |
| EF206717 | SAD1-3670var1            | AB503857  | Jpn03-1              |
| EF206718 | SAD1-3670var2            | AF371337  | 00-1                 |
| EF206719 | SAG 2                    | AY297748  | CAN98-75             |
| EF206720 | SAD Bern                 | AY297749  | CAN97-83             |
| EF437215 | NNV-RAB-H                | AY525843  | NL/1/99              |
| EF564174 | CTN181                   | AY579780  | USA                  |
| EU182346 | RB/E3-15                 | AY590688  | Colorado             |
| EU182347 | Rb/E3-15-5               | AY640317  | LAH A                |
| EU293111 | 8764THA                  | DQ009484  | 15a                  |
| EU293113 | 9001FRA                  | DQ843658  | BJ1816               |
| EU293115 | 9147FRA                  | DQ843659  | BJ1887               |
| EU293116 | 9704ARG                  | EF199771  | PL-1                 |
| EU293121 | 8743THA                  | EF199772  | PL-2                 |
| EU311738 | RRV ON-99-2              | EF535506  | TW05-00125           |
| EU549783 | BD06                     | FJ168778  | NL/94/01             |
| EU643590 | HN10                     | FJ168779  | NL/00/17             |
| EU877067 | SAD B19-4 <sup>th</sup>  | FJ977568  | aMPV/MN/turkey/2a/97 |
| EU877068 | SAD B19                  | GQ153651  | HMPVgz01             |
| EU877069 | SAD B19-1 <sup>st</sup>  | NC_004148 | CAN97-83             |
| EU877070 | SAD B19-5 <sup>th</sup>  | NC_007652 | 15a                  |
| EU877071 | SAD B19-10 <sup>th</sup> |           |                      |
| FJ577895 | Flury-LEP-C              |           |                      |
| FJ712193 | D01                      |           |                      |
| FJ712194 | D02                      | AB474397  | 007Lm                |
| FJ712195 | F02                      | AF014953  | Onderstepoort        |
| FJ712196 | F04                      | AF164967  | A75/17               |
| FJ866835 | FJ008                    | AF305419  | Onderstepoort        |
| FJ866836 | FJ009                    | AF378705  | Onderstepoort-OS     |
| FJ913470 | ERA-VC                   | AY386315  | 5804                 |
| FJ959397 | CTN-1                    | AY386316  | 5804P                |
| GQ918139 | CVS-11                   | AY443350  | 00-2601              |
| GU345746 | CQ92                     | AY445077  | 98-2645              |
| GU345747 | J                        | AY466011  | 98-2654              |

### ***Metapneumovirus***

#### ***Avian/human metapneumovirus***

### ***Morbilivirus***

#### ***Canine distemper virus***

|           |               |           |               |
|-----------|---------------|-----------|---------------|
| GU345748  | SH06          | AY542312  | 98-2646       |
| AY649446  | 01-2689       | NC_001498 | Ichinose-B95a |
| EU716337  | 164071        |           |               |
| GU138403  | Snyder Hill   |           |               |
| HM046486  | Phoca/Caspian |           |               |
| HM063009  | Shuskiy       |           |               |
| HM852904  | MKY-KM08      |           |               |
| NC_001921 | CDV           |           |               |

***Measles virus***

---

|          |                |
|----------|----------------|
| AB254456 | SSPE-Kobe-1    |
| AB481087 | T11wild        |
| AB481088 | T11Ve-23       |
| AF266286 | AIK-C          |
| AF266287 | Moraten        |
| AF266288 | Edmonston      |
| AF266289 | Rubeovax       |
| AF266290 | Zagreb         |
| AF266291 | Schwarz        |
| AY486083 | EZD22          |
| AY486084 | EZD24 2/99     |
| AY730614 | Leningrad-4    |
| DQ211902 | CHN/7.05/4     |
| DQ227318 | CRO/47.02/[D6] |
| DQ227319 | 97-45881       |
| DQ227320 | CRO/08.03/SSPE |
| DQ227321 | WA.USA/17.98   |
| DQ345721 | CAM-70         |
| DQ345722 | CAM-70         |
| DQ345723 | CAM-70         |
| EF033071 | Changchun-47   |
| EU293548 | D-V/S          |
| EU293549 | D-CEF          |
| EU293550 | Davis87        |
| EU293551 | D-VI           |
| EU293552 | D-VII          |
| EU435017 | Shanghai-191   |
| FJ161211 | IMB-1          |
| FJ211583 | 0349U          |
| FJ211589 | MEV10016       |
| FJ211590 | AMJRB107B      |
| FJ416067 | Shanghai-191   |
| FJ416068 | Changchun-47   |
| GQ376026 | MV99Y          |
| GQ376027 | MV99YC7        |
| K01711   | Edmonston      |

***Pneumovirus***

***Respiratory syncytial virus***

---

|           |              |
|-----------|--------------|
| AF013254  | B1           |
| AF013255  | Cp52         |
| AF035006  | rA2cp        |
| AY353550  | 9320         |
| AY911262  | ATCC VR-26   |
| FJ948820  | 98-25147-X   |
| NC_001781 | HRSV         |
| U39662    | S2           |
| U50362    | Cp-RSV       |
| U50363    | Cpts-248     |
| U63644    | Cpts-248/404 |

***Respirovirus***

***Sendai virus***

---

|           |         |
|-----------|---------|
| AB005795  | M1      |
| AB039658  | E0      |
| AB195967  | E-5     |
| AB195968  | Nagoya  |
| AB275416  | Cl.151  |
| DQ219803  | BB1     |
| EF679198  | Tianjin |
| M30202    | Z       |
| M69046    | T-5     |
| NC_001552 | Ohita   |

***Rubulavirus***

***Mumps virus***

---

|          |                  |
|----------|------------------|
| AB040874 | Miyahara         |
| AB470486 | Hoshino          |
| AB576764 | Y213             |
| AF201473 | Jeryl Lynn       |
| AF280799 | Glouc1/UK96      |
| AF314561 | Biken            |
| AF314562 | 87 1005          |
| AF314558 | SIPAR02          |
| AF467767 | 88-1961          |
| AY309060 | Dg1062/Korea/98  |
| AY508995 | L3/Russia/Vector |
| AY669145 | Drag94           |
| AY681495 | PetroNov         |

|           |           |
|-----------|-----------|
| AY685921  | L-Zagreb  |
| DQ649478  | SP        |
| EU370206  | 9218/Zg98 |
| EU370207  | Du/CRO05  |
| EU884413  | SP        |
| FJ375177  | 1004-10/2 |
| FJ375178  | Gw7       |
| FJ556896  | SP-A      |
| GU980052  | Enders    |
| FN431985  | JL2       |
| NC_002200 | Miyahara  |

**Vesiculovirus**

*Vesicular stomatitis virus*

---

|           |              |
|-----------|--------------|
| AF473864  | 98COE        |
| AF473865  | 85CLB        |
| AF473866  | 94GUB        |
| AM690337  | Indiana      |
| AM690336  | Indiana      |
| EF197793  | MARMC        |
| EU849003  | Mudd-Summers |
| J02428    | Indiana      |
| NC_001560 | Indiana      |

*Parainfluenza virus Type 3*

---

|           |                 |
|-----------|-----------------|
| AF178654  | Kansas/15626/84 |
| AF178655  | Shipping Fever  |
| D84095    | 910N            |
| EU277658  | Q5592           |
| EU326526  | ZHYMgz01        |
| EU424062  | 14702           |
| EU439428  | 92-7783_ISU-92  |
| EU439429  | 81-19252_Texas  |
| FJ455842  | LZ22            |
| NC_001796 | HPIV3           |
| NC_002161 | HPIV3           |
| U51116    | Cp-45           |

**Supplementary Table 2.** Relative mRNA and protein abundance for each *Mononegavirales* species and the associated source of information.

| Virus                              | Gene                     |       |     |        |       |      |      |        |      |       |      |      | Reference                                     |
|------------------------------------|--------------------------|-------|-----|--------|-------|------|------|--------|------|-------|------|------|-----------------------------------------------|
|                                    | NS1                      | NS2   | N   | P(V/C) | M     | SH   | F    | G/H/HN | M2   | VP30  | VP24 | L    |                                               |
|                                    | <b>mRNA abundance</b>    |       |     |        |       |      |      |        |      |       |      |      |                                               |
| <i>Newcastle disease virus</i>     | *                        | *     | 100 | 86.9   | 84.8  | *    | 82.3 | 64.8   | *    | *     | *    | 4.7  | 4 (Fig 2. Lines a & d)                        |
| <i>Borna disease virus</i>         | *                        | *     | -   | -      | -     | *    | *    | -      | *    | *     | *    | -    |                                               |
| <i>Ebola virus</i>                 | *                        | *     | 100 | 325.8  | 391   | *    | *    | 68.7   | *    | 218.6 | 97   | -    | 14 (Fig 1. Line 4)                            |
| <i>Nipah virus</i>                 | *                        | *     | -   | -      | -     | *    | -    | -      | *    | *     | *    | -    |                                               |
| <i>Rabies virus</i>                | *                        | *     | 100 | 70.2   | 42.6  | *    | *    | 21.2   | *    | *     | *    | 1    | 9 (Fig 5)                                     |
| <i>Avian/Human metapneumovirus</i> | *                        | *     | -   | -      | -     | -    | -    | -      | -    | *     | *    | -    |                                               |
| <i>Canine distemper virus</i>      | *                        | *     | 100 | 93.6   | 81.3  | *    | 76.9 | 64.8   | *    | *     | *    | 59.6 | 18 (Fig 4. 56 days pi <sup>†</sup> )          |
| <i>Measles virus</i>               | *                        | *     | 100 | 34     | 25    | *    | 20   | 15     | *    | *     | *    | 1.5  | 3 (Fig 4. Panel E)                            |
| <i>Respiratory syncytial virus</i> | 111.1                    | 105.6 | 100 | 75.6   | 57.8  | 35.6 | 20   | 23.3   | 16.7 | *     | *    | 3.3  | 1 (Fig 6)                                     |
| <i>Sendai virus</i>                | *                        | *     | 100 | 68     | 100   | *    | 38   | 33     | *    | *     | *    | 3    | 10 (Table 1)                                  |
| <i>Mumps virus</i>                 | *                        | *     | 100 | 39.2   | 62.6  | -    | 31.5 | 6.6    | *    | *     | *    | 0.6  | 15 (Fig 2)                                    |
| <i>Parainfluenza virus type 3</i>  | *                        | *     | 100 | 31.6   | -     | *    | 20.9 | 19.3   | *    | *     | *    | 14.2 | 5 (Fig 4)                                     |
| <i>Vesicular stomatitis virus</i>  | *                        | *     | 100 | 75     | 50    | *    | *    | 36     | *    | *     | *    | 5.6  | 16 (Table 1)                                  |
|                                    | <b>Protein abundance</b> |       |     |        |       |      |      |        |      |       |      |      |                                               |
| <i>Newcastle disease virus</i>     | *                        | *     | 100 | 46.7   | 99.5  | *    | 51   | 83.7   | *    | *     | *    | 38.3 | 8 (Fig 1. Panels A & B)                       |
| <i>Borna disease virus</i>         | *                        | *     | -   | -      | -     | *    | *    | -      | *    | *     | *    | -    |                                               |
| <i>Ebola virus</i>                 | *                        | *     | 100 | 49.1   | 121.5 | *    | *    | 179.5  | *    | 154.2 | 40.6 | 23.7 | 14 (Fig 2. Line 2)                            |
| <i>Nipah virus</i>                 | *                        | *     | -   | -      | -     | *    | -    | -      | *    | *     | *    | -    |                                               |
| <i>Rabies virus</i>                | *                        | *     | 100 | 86     | 52    | *    | *    | 64     | *    | *     | *    | 1.9  | 13 (Table 1)                                  |
| <i>Avian/Human metapneumovirus</i> | *                        | *     | -   | -      | -     | -    | -    | -      | -    | *     | *    | -    |                                               |
| <i>Canine distemper virus</i>      | *                        | *     | 100 | 58     | 62.3  | *    | 43   | 62.3   | *    | *     | *    | -    | 6 (Fig. 7)                                    |
| <i>Measles virus</i>               | *                        | *     | 100 | 51.8   | 86.6  | *    | -    | 44.7   | *    | *     | *    | 8    | 2 (Fig. 6. Panel b)                           |
| <i>Respiratory syncytial virus</i> | 39.6                     | -     | 100 | 107.7  | 138.8 | -    | 8.6  | 338.5  | -    | *     | *    | 46.4 | 12 (Fig 1. 16 hours pi <sup>†</sup> , line l) |
| <i>Sendai virus</i>                | *                        | *     | 100 | 88.7   | 47    | *    | 61.3 | 68.6   | *    | *     | *    | 9.1  | 11 (Fig 1)                                    |
| <i>Mumps virus</i>                 | *                        | *     | 100 | 137.1  | 99.7  | -    | 56.2 | 87.1   | *    | *     | *    | 54   | 7 (Fig 2. Line g)                             |
| <i>Parainfluenza virus type 3</i>  | *                        | *     | 100 | 49.3   | 127.4 | *    | 116  | 144.9  | *    | *     | *    | 55.2 | 17 (Fig 1. 21 hours pi <sup>†</sup> )         |
| <i>Vesicular stomatitis virus</i>  | *                        | *     | 100 | 77     | 53    | *    | *    | 34     | *    | *     | *    | 6.9  | 16 (Table 2)                                  |

\* Gene not present in this species.

- No information available.

† post infection

## REFERENCES

1. **Barik S.** 1992. Transcription of human Respiratory syncytial virus genome in RNA in vitro: Requirement of cellular factor(s). *J Virol.* **66**:6813-6818.
2. **Campbell JJ, Cosby SL, Scott JK, Rima BK, Martin SJ, Appel M.** 1980. A comparison of measles and canine distemper virus polypeptides. *J. Gen. Virol.* 48:149-159.
3. **Cattaneo R, Rebmann G, Schmid A, Baczko K, Meulen V, Billeter M.** 1987. Altered transcription of a defective measles virus genome desived from diseased human brain. *EMBO J.* **6**:681-688.
4. **Collins PL, Hightower LE, Ball LA.** 1978. Transcription and translation of Newcastle disease virus mRNA's in vitro. *J. Virol.* **28**:324-336.
5. **De BP, Galinski MS, Banerjee AK.** 1990. Characterization of an in vitro system for the synthesis of mRNA from human Parainfluenza virus type 3. *J. Virol.* **64**:1135-1142.
6. **Hall WW, Lamb RA, Choppin W.** 1980. The polypeptides of canine distemper virus: synthesis in infected cells relatedness to the polypeptides of other morbilliviruses. *Virology* **100**:433-449.
7. **Herrler G, Compans RW.** 1982. Synthesis of Mumps virus polypeptides in infected Vero cells. *Virology* **119**: 430-438.
8. **Hightower LE, Morrison TG, Bratt MA.** 1975. Relationships among the polypeptides of Newcastle disease virus. *J. Virol.* **16**:1599-1607.
9. **Holloway BP, Obijeski, JF.** 1980. Rabies virus-induced RNA synthesis on BHK21 cells. *J. Gen. Virol.* **49**:181-195.
10. **Homann HE, Hofschneider PH, Neubert WJ.** 1990. Sendai virus gene expression in lytically and persistently infected cells. *Virology* **177**:131-140.
11. **Lamb RA, Mahy BW, Choppin PW.** 1976. The synthesis of Sendai virus polypeptides in infected cells. *Virology* **69**:116-131.
12. **Lambert DM, Hambor J, Diebold M, Galinski B.** 1988. Kinetics of synthesis and phosphorylation of Respiratory syncytial virus polypeptides. *J. Gen. Virol.* **69**:313-323.
13. **Madore HP, England JM.** 1977. Rabies virus protein synthesis in infected BHK-21 cells. *J. Virol.* **22**:102-112.

14. **Sanchez A, Kiley MP.** 1987. Identification and analysis of Ebola virus messenger RNA. *Virology* **157**:414-420.
15. **Taheuchi K, Tanabayashi K, Okazaki K, Hiahiyama M, Yamada A.** 1993. In vitro transcription and replication of the Mumps virus genome. *Arch. Virol.* **128**:177-183.
16. **Villarreal LP, Breindl M, Holland JJ.** 1976. Determination of molar ratios of Vesicular stomatitis virus induced RNA species in BHK<sub>21</sub> cells. *Biochemistry* **15**:1663-1667.
17. **Wechler SL, Lambert DM, Galinski MS, Pons MW.** 1985. Intracellular synthesis of human Parainfluenza type 3 virus-specified polypeptides. *J. Virol.* **54**:661-664.
18. **Zurbriggen A, Graber HU, Wagner A, Vandevelde M.** 1995. Canine distemper virus persistence in the nervous system is associated with noncytolytic selective virus spread. *J. Virol.* **69**:1678-1686.



**Supplementary Table 3.** Calculation of relative mRNA abundance for the *Mononegavirales* genes.

| Species                     | Gene  | Measurement method <sup>a</sup> | Densitometry (Bg corrected) <sup>b</sup> | Gene length | mRNA abundance <sup>c</sup> | Relative mRNA abundance (%) <sup>d</sup> |
|-----------------------------|-------|---------------------------------|------------------------------------------|-------------|-----------------------------|------------------------------------------|
| Rabies virus                | N     | ( <sup>3</sup> H)Uridine        | 208.74                                   | 1353        | 0.1543                      | 100                                      |
|                             | P     |                                 | 96.82                                    | 894         | 0.1083                      | 70.2                                     |
|                             | M     |                                 | 41.98                                    | 639         | 0.0657                      | 42.6                                     |
|                             | G     |                                 | 51.50                                    | 1575        | 0.0327                      | 21.2                                     |
|                             | L     |                                 | 9.58                                     | 6387        | 0.0015                      | 1                                        |
| Vesicular stomatitis virus  | N     | Author's                        | -                                        | NA          | -                           | 100                                      |
|                             | P(NS) |                                 | -                                        | NA          | -                           | 75                                       |
|                             | M     |                                 | -                                        | NA          | -                           | 50                                       |
|                             | G     |                                 | -                                        | NA          | -                           | 36                                       |
|                             | L     |                                 | -                                        | NA          | -                           | 5.6                                      |
| Ebola virus                 | N     | ( <sup>3</sup> H)Uridine        | 8900                                     | 2220        | 2.99663                     | 100                                      |
|                             | VP35  |                                 | 13425                                    | 1023        | 9.76364                     | 325.8                                    |
|                             | VP40  |                                 | 17621                                    | 981         | 11.71609                    | 391                                      |
|                             | G     |                                 | 4949                                     | 2166        | 2.05779                     | 68.7                                     |
|                             | VP30  |                                 | 7119                                     | 867         | 6.54921                     | 218.6                                    |
|                             | VP24  |                                 | 4684                                     | 756         | 2.90751                     | 97                                       |
| Respiratory syncytial virus | NS1   | Author's                        | -                                        | NA          | -                           | 111.1                                    |
|                             | NS2   |                                 | -                                        | NA          | -                           | 105.6                                    |
|                             | N     |                                 | -                                        | NA          | -                           | 100                                      |
|                             | P     |                                 | -                                        | NA          | -                           | 75.6                                     |
|                             | M     |                                 | -                                        | NA          | -                           | 57.8                                     |
|                             | SH    |                                 | -                                        | NA          | -                           | 35.6                                     |
|                             | G     |                                 | -                                        | NA          | -                           | 20                                       |
|                             | F     |                                 | -                                        | NA          | -                           | 23.3                                     |
|                             | M2    |                                 | -                                        | NA          | -                           | 16.7                                     |
| L                           |       | -                               | NA                                       | -           | 3.3                         |                                          |
| Canine distemper virus      | N     | Probe                           | 1.192                                    | NA          | -                           | 100                                      |
|                             | P/V/C |                                 | 1.116                                    | NA          | -                           | 93.6                                     |
|                             | M     |                                 | 0.969                                    | NA          | -                           | 81.3                                     |
|                             | F     |                                 | 0.917                                    | NA          | -                           | 76.9                                     |
|                             | H     |                                 | 0.772                                    | NA          | -                           | 64.8                                     |
|                             | L     |                                 | 0.711                                    | NA          | -                           | 59.6                                     |
| Newcastle disease virus     | N     | ( <sup>3</sup> H)Uridine        | 137.67                                   | 1470        | 0.09365                     | 100                                      |
|                             | P/V   |                                 | 97.67                                    | 1200        | 0.08139                     | 86.9                                     |
|                             | M     |                                 | 87                                       | 1095        | 0.07945                     | 84.8                                     |
|                             | F     |                                 | 130.67                                   | 1695        | 0.07709                     | 82.3                                     |
|                             | HN    |                                 | 106.67                                   | 1758        | 0.06067                     | 64.8                                     |
|                             | L     |                                 | 29                                       | 6615        | 0.00438                     | 4.7                                      |
| Sendai virus                | N     | Author's                        | -                                        | NA          | -                           | 100                                      |
|                             | P/C/V |                                 | -                                        | NA          | -                           | 68                                       |
|                             | M     |                                 | -                                        | NA          | -                           | 100                                      |
|                             | F     |                                 | -                                        | NA          | -                           | 38                                       |
|                             | HN    |                                 | -                                        | NA          | -                           | 33                                       |
|                             | L     |                                 | -                                        | NA          | -                           | 3                                        |
| Mumps virus                 | N     | ( <sup>32</sup> P)Phosphate     | 174.67                                   | 1650        | 0.10586                     | 100                                      |
|                             | P/V   |                                 | 48.67                                    | 1173        | 0.04149                     | 39.2                                     |
|                             | M     |                                 | 74.67                                    | 1127        | 0.06600                     | 62.6                                     |
|                             | F     |                                 | 39.67                                    | 1188        | 0.03339                     | 31.5                                     |

|                       |       |          |       |      |        |      |
|-----------------------|-------|----------|-------|------|--------|------|
|                       | SH    |          | -     | 1617 | -      | -    |
|                       | HN    |          | 12.33 | 1749 | 0.0070 | 6.6  |
|                       | L     |          | 4.67  | 6834 | 0.0007 | 0.6  |
| Parainfluenza virus 3 | N     | Probe    | 49.3  | NA   | -      | 100  |
|                       | P/C   |          | 15.6  | NA   | -      | 31.6 |
|                       | M     |          | 10.3  | NA   | -      | 20.9 |
|                       | F     |          | 9.5   | NA   | -      | 19.3 |
|                       | HN    |          | 7.0   | NA   | -      | 14.2 |
|                       | L     |          |       |      |        |      |
| Measles virus         | N     | Author's | -     | NA   | -      | 100  |
|                       | P/V/C |          | -     | NA   | -      | 34   |
|                       | M     |          | -     | NA   | -      | 25   |
|                       | F     |          | -     | NA   | -      | 20   |
|                       | H     |          | -     | NA   | -      | 15   |
|                       | L     |          | -     | NA   | -      | 1.5  |

<sup>a</sup> Method used to detect the corresponding mRNA. (<sup>3</sup>H)Uridine/(<sup>32</sup>P)Phosphate: Addition of radiolabeling during infection/transcription. Probe: Hybridization with RNA probes specific for each mRNA. Author's: Values given in the manuscript.

<sup>b</sup> Densitometry values obtained with ImageJ v1.45, automatically corrected for background intensity.

<sup>c</sup> Corrected for gene length = Densitometry/gene length, arbitrary units.

<sup>d</sup> % of mRNA abundance relative to that of the N gene: Corrected densitometry(N)/Corrected densitometry(gene)\*100.

NA. Not applicable to the measurement method of mRNA abundance of the gene.

**Supplementary Table 4.** Calculation of relative protein abundance for the *Mononegavirales* genes.

| Species                     | Gene  | Measurement method <sup>a</sup> | Densitometry (Bg corrected) <sup>b</sup> | Number of labeled AA | Protein abundance <sup>c</sup> | Relative protein abundance (%) <sup>d</sup> |
|-----------------------------|-------|---------------------------------|------------------------------------------|----------------------|--------------------------------|---------------------------------------------|
| Rabies virus                | N     | Author's                        | -                                        | NA                   | -                              | 100                                         |
|                             | P     |                                 | -                                        | NA                   | -                              | 86                                          |
|                             | M     |                                 | -                                        | NA                   | -                              | 52                                          |
|                             | G     |                                 | -                                        | NA                   | -                              | 64                                          |
|                             | L     |                                 | -                                        | NA                   | -                              | 1.9                                         |
| Vesicular stomatitis virus  | N     | Author's                        | -                                        | NA                   | -                              | 100                                         |
|                             | P(NS) |                                 | -                                        | NA                   | -                              | 77                                          |
|                             | M     |                                 | -                                        | NA                   | -                              | 53                                          |
|                             | G     |                                 | -                                        | NA                   | -                              | 34                                          |
|                             | L     |                                 | -                                        | NA                   | -                              | 6.9                                         |
| Ebola virus                 | N     | ( <sup>35</sup> S) methionine   | 1152.18                                  | 20                   | 57.609                         | 100.0                                       |
|                             | VP35  |                                 | 226.08                                   | 8                    | 28.260                         | 49.1                                        |
|                             | VP40  |                                 | 560.15                                   | 8                    | 70.019                         | 121.5                                       |
|                             | G     |                                 | 413.71                                   | 4                    | 103.428                        | 179.5                                       |
|                             | VP30  |                                 | 266.46                                   | 3                    | 88.820                         | 154.2                                       |
|                             | VP24  |                                 | 210.42                                   | 9                    | 23.380                         | 40.6                                        |
|                             | L     |                                 | 517.84                                   | 38                   | 13.627                         | 23.7                                        |
| Respiratory syncytial virus | NS1   | ( <sup>35</sup> S) methionine   | 251.16                                   | 7                    | 35.880                         | 39.6                                        |
|                             | NS2   |                                 | -                                        | 5                    | -                              | -                                           |
|                             | N     |                                 | 1267.73                                  | 14                   | 90.552                         | 100                                         |
|                             | P     |                                 | 682.44                                   | 7                    | 97.491                         | 107.7                                       |
|                             | M     |                                 | 1005.65                                  | 8                    | 125.706                        | 138.8                                       |
|                             | SH    |                                 | -                                        | 3                    | -                              | -                                           |
|                             | G     |                                 | 612.95                                   | 2                    | 306.475                        | 338.5                                       |
|                             | F     |                                 | 77.81                                    | 10                   | 7.781                          | 8.6                                         |
|                             | M2    |                                 | -                                        | 4                    | -                              | -                                           |
| L                           |       | 1976.67                         | 47                                       | 42.057               | 46.4                           |                                             |
| Canine distemper virus      | N     | ( <sup>35</sup> S) methionine   | 4756                                     | 17                   | 279.78                         | 100                                         |
|                             | P/V/C |                                 | 1623                                     | 10                   | 162.36                         | 58                                          |
|                             | M     |                                 | 1917                                     | 11                   | 174.29                         | 62.3                                        |
|                             | F     |                                 | 1445                                     | 12                   | 120.42                         | 43                                          |
|                             | H     |                                 | 2092                                     | 12                   | 174.38                         | 62.3                                        |
|                             | L     |                                 | -                                        | 49                   | -                              | -                                           |
| Newcastle disease virus     | N     | ( <sup>35</sup> S) methionine   | 3476.55                                  | 17                   | 204.503                        | 100.0                                       |
|                             | P/V   |                                 | 1242.00                                  | 13                   | 95.538                         | 46.7                                        |
|                             | M     |                                 | 1220.93                                  | 6                    | 203.488                        | 99.5                                        |
|                             | F     |                                 | 1356.00                                  | 13                   | 104.308                        | 51.0                                        |
|                             | HN    |                                 | 1711.12                                  | 10                   | 171.112                        | 83.7                                        |
|                             | L     |                                 | 4696.65                                  | 60                   | 78.278                         | 38.3                                        |
| Sendai virus                | N     | ( <sup>35</sup> S) methionine   | 17325.0                                  | 15                   | 1155.000                       | 100.0                                       |
|                             | P/C/V |                                 | 10242.0                                  | 10                   | 1024.200                       | 88.7                                        |
|                             | M     |                                 | 4886.0                                   | 9                    | 542.889                        | 47.0                                        |
|                             | F     |                                 | 7075.0                                   | 10                   | 707.500                        | 61.3                                        |
|                             | HN    |                                 | 6336.0                                   | 8                    | 792.000                        | 68.6                                        |
|                             | L     |                                 | 5142.8                                   | 49                   | 104.955                        | 9.1                                         |
| Mumps virus                 | N     | ( <sup>3</sup> H) leucine       | 172.15                                   | 52                   | 3.311                          | 100.0                                       |
|                             | P/V   |                                 | 104.397                                  | 23                   | 4.539                          | 137.1                                       |

|                       |       |                               |         |     |        |       |
|-----------------------|-------|-------------------------------|---------|-----|--------|-------|
|                       | M     |                               | 105.656 | 32  | 3.302  | 99.7  |
|                       | F     |                               | 106.128 | 57  | 1.862  | 56.2  |
|                       | SH    |                               | -       | 11  | -      | -     |
|                       | HN    |                               | 161.491 | 56  | 2.884  | 87.1  |
|                       | L     |                               | 517.106 | 289 | 1.789  | 54.0  |
| Parainfluenza virus 3 | N     | ( <sup>35</sup> S) methionine | 228.990 | 16  | 14.312 | 100.0 |
|                       | P/C   |                               | 91.728  | 13  | 7.056  | 49.3  |
|                       | M     |                               | 164.052 | 9   | 18.228 | 127.4 |
|                       | F     |                               | 149.460 | 9   | 16.607 | 116.0 |
|                       | HN    |                               | 228.098 | 11  | 20.736 | 144.9 |
|                       | L     |                               | 426.384 | 54  | 7.896  | 55.2  |
| Measles virus         | N     | ( <sup>35</sup> S) methionine | 1034    | 15  | 68.93  | 100   |
|                       | P/V/C |                               | 357     | 10  | 35.7   | 51.8  |
|                       | M     |                               | 597     | 10  | 59.7   | 86.6  |
|                       | F     |                               | -       | 12  | -      | -     |
|                       | H     |                               | 493     | 16  | 30.8   | 44.7  |
|                       | L     |                               | 286     | 52  | 5.5    | 8     |

<sup>a</sup> Method used to detect the corresponding mRNA. (<sup>35</sup>S) methionine/(<sup>3</sup>H) leucine: Addition of radiolabeled amino-acid during infection. Author's: Values given in the manuscript.

<sup>b</sup> Densitometry values obtained with ImageJ v1.45, automatically corrected for background intensity.

<sup>c</sup> Corrected for gene length = Densitometry/gene length, arbitrary units.

<sup>d</sup> % of protein abundance relative to that of the N gene: Corrected densitometry(N)/Corrected densitometry(protein)\*100.

NA. Not applicable to the measurement method of protein abundance of the gene.

**Supplementary Table 5.** Analysis of the association between relative position in the genome and  $d_N/d_S$ ,  $d_N$  and  $d_S$  in coding regions of the *Mononegavirales*.

| Virus species                 | N <sup>a</sup> | $d_N/d_S$ |             |             | $d_N$ |           |             | $d_S$ |           |             | Modification <sup>e</sup> |
|-------------------------------|----------------|-----------|-------------|-------------|-------|-----------|-------------|-------|-----------|-------------|---------------------------|
|                               |                | $r^b$     | $r_{mod}^c$ | $r_{nov}^d$ | $r$   | $r_{mod}$ | $r_{nov}^d$ | $r$   | $r_{mod}$ | $r_{nov}^d$ |                           |
| <b><i>Bornaviridae</i></b>    |                |           |             |             |       |           |             |       |           |             |                           |
| Borna disease virus           | 12             | 0.56      | 0.94*       | 0.85*       | -0.28 | 0.99*     | 0.85*       | 0.73  | 0.36      | -0.16       | L                         |
| <b><i>Rhabdoviridae</i></b>   |                |           |             |             |       |           |             |       |           |             |                           |
| Vesicular stomatitis virus    | 7              | -0.04     | 0.92*       | 0.86*       | -0.09 | 0.91*     | 0.77*       | 0.07  | 0.45      | 0.30        | (P), L                    |
| Rabies virus                  | 60             | -0.33     | 0.99*       | -           | -0.33 | 0.89*     | -           | -0.77 | -0.75     | -           | P, L                      |
| <b><i>Filoviridae</i></b>     |                |           |             |             |       |           |             |       |           |             |                           |
| Ebola virus                   | 18             | -0.43     | -           | -           | -0.44 | -         | -           | 0.17  | -         | -           | -                         |
| <b><i>Pneumoviridae</i></b>   |                |           |             |             |       |           |             |       |           |             |                           |
| A/H metapneumovirus           | 19             | 0.50      | 0.80*       | -           | 0.33  | 0.77*     | -           | 0.18  | -0.43     | -           | L                         |
| Respiratory syncytial virus   | 11             | 0.17      | 0.20        | -           | 0.15  | 0.09      | -           | 0.10  | -0.16     | -           | G, L                      |
| <b><i>Paramyxoviridae</i></b> |                |           |             |             |       |           |             |       |           |             |                           |
| Newcastle disease virus       | 110            | -0.35     | 0.96*       | 0.98*       | -0.28 | 0.99*     | 0.99*       | 0.12  | -0.85     | -0.82       | (P), L                    |
| Sendai virus                  | 6              | -0.39     | 0.89*       | 0.71*       | 0.75* | 0.85*     | 0.76*       | 0.47  | 0.58      | 0.37        | (P), L                    |
| Mumps virus                   | 23             | 0.12      | 0.41        | 0.57        | -0.30 | 0.03      | 0.52        | 0.20  | 0.61      | 0.69        | L                         |
| Parainfluenza virus 3         | 12             | -0.37     | 0.78*       | 0.76*       | -0.10 | 0.81*     | 0.88*       | 0.71  | 0.99*     | -0.83*      | (P), L                    |
| Canine distemper virus        | 18             | -0.07     | 0.37        | 0.76*       | 0.01  | 0.47      | 0.82*       | 0.55  | 0.69      | 0.61        | L                         |
| Measles virus                 | 37             | -0.38     | 0.95*       | 0.74*       | 0.07  | 0.89*     | 0.88*       | -0.05 | 0.94*     | -0.06       | (P), L                    |
| Nipah virus                   | 12             | -0.32     | 0.91*       | 0.81*       | 0.26  | 0.76*     | 0.74*       | 0.57  | 0.47      | -0.17       | (P), L                    |

<sup>a</sup>Number of sequences

<sup>b</sup>Pearson's Correlation coefficient

<sup>c</sup>Pearson's Correlation coefficient excluding P, G, and/or L

<sup>d</sup>Pearson's Correlation coefficient using non-overlapping regions of the P gene, and excluding L.

<sup>e</sup>Excluded gene(s)

\* $P < 0.05$

Cases in which values obtained using the full length P gene were substituted for those obtained considering only non-overlapping regions of this gene are shown in parentheses.

**Supplementary Table 6.** Analysis of the association between genetic diversity and length, and between relative position and length of non-coding regions in the *Mononegavirales*.

| Virus species                    | <i>d</i> to Length    |                                           | Length to Relative Position |                                           | Modification <sup>d</sup> |
|----------------------------------|-----------------------|-------------------------------------------|-----------------------------|-------------------------------------------|---------------------------|
|                                  | <i>r</i> <sup>b</sup> | <i>r</i> <sub>modified</sub> <sup>c</sup> | <i>r</i> <sup>b</sup>       | <i>r</i> <sub>modified</sub> <sup>c</sup> |                           |
| <b><i>Bornaviridae</i></b>       |                       |                                           |                             |                                           |                           |
| Borna disease virus              | 0.18 (0.730)          | 0.16 (0.794)                              | 0.14 (0.785)                | 0.11 (0.857)                              | P                         |
| <b><i>Rhabdoviridae</i></b>      |                       |                                           |                             |                                           |                           |
| Vesicular stomatitis virus       | 0.76 (0.079)          | 0.78 (0.112)                              | 0.56 (0.249)                | 0.84 (0.076)                              | 5'UTR                     |
| Rabies virus                     | 0.15 (0.778)          | 0.24 (0.698)                              | 0.53 (0.274)                | 0.53 (0.358)                              | G                         |
| <b><i>Filoviridae</i></b>        |                       |                                           |                             |                                           |                           |
| Ebola virus                      | 0.22 (0.605)          | 0.44 (0.318)                              | 0.54 (0.169)                | 0.36 (0.431)                              | 5'UTR                     |
| <b><i>Pneumoviridae</i></b>      |                       |                                           |                             |                                           |                           |
| A/H metapneumovirus <sup>e</sup> | <b>0.88 (0.002)</b>   | <b>0.96 (0.001)</b>                       | <b>0.85 (0.004)</b>         | <b>0.90 (0.006)</b>                       | F, 5'UTR                  |
| Respiratory syncytial virus      | <b>0.68 (0.021)</b>   | -                                         | <b>0.64 (0.034)</b>         | -                                         | -                         |
| <b><i>Paramyxoviridae</i></b>    |                       |                                           |                             |                                           |                           |
| Newcastle disease virus          | 0.56 (0.189)          | 0.80 (0.053)                              | 0.03 (0.948)                | 0.54 (0.270)                              | P                         |
| Sendai virus                     | 0.21 (0.654)          | 0.36 (0.547)                              | 0.01 (0.991)                | 0.21 (0.732)                              | L, 5'UTR                  |
| Mumps virus                      | -0.05 (0.897)         | -                                         | -0.23 (0.585)               | -                                         | -                         |
| Parainflueza virus 3             | 0.45 (0.368)          | 0.37 (0.546)                              | -0.03 (0.951)               | 0.12 (0.851)                              | F, 5'UTR                  |
| Canine distemper virus           | 0.56 (0.187)          | 0.58 (0.309)                              | 0.03 (0.948)                | 0.44 (0.455)                              | L, 5'UTR                  |
| Measles virus                    | -0.29 (0.522)         | -0.25 (0.680)                             | -0.32 (0.480)               | -0.36 (0.550)                             | F, 5'UTR                  |
| Nipah virus                      | 0.68 (0.109)          | 0.82 (0.100)                              | -0.02 (0.966)               | 0.83 (0.083)                              | P, 5'UTR                  |
| ALL                              | 0.43 (0.169)          | 0.54 (0.099)                              | 0.24 (0.229)                | 0.24 (0.183)                              | Outliers                  |

<sup>a</sup> Number of sequences

<sup>b</sup> Pearson correlation coefficient (*p*-value). Genetic distance calculated using all genes.

<sup>c</sup> Pearson correlation coefficient (*p*-value). Genetic distance calculated excluding outliers.

<sup>d</sup> Excluded non-coding region(s). Internal non-coding regions are named by the gene located downstream.

<sup>e</sup> Avian/Human metapneumovirus.

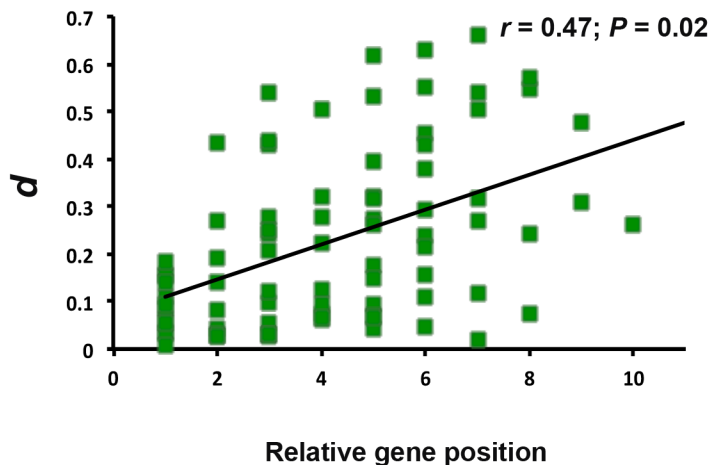

### Bornaviridae

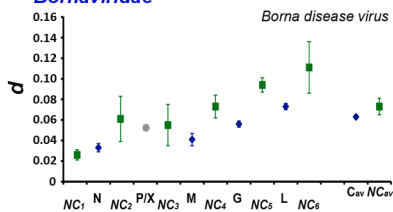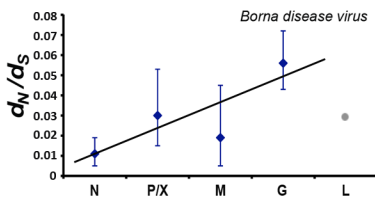

### Pneumoviridae

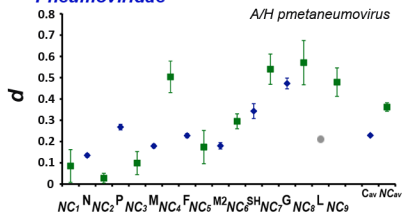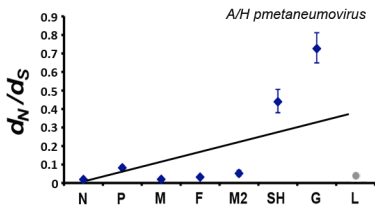

### Paramyxoviridae

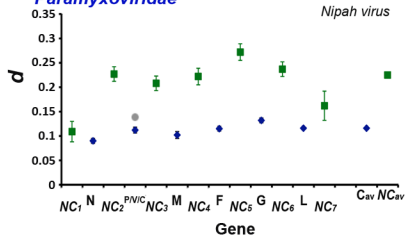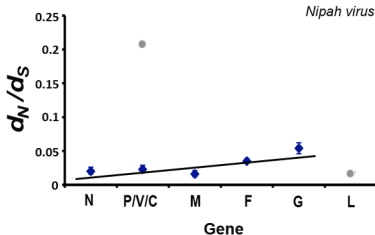

**Figure S1.** Correlation between relative gene position and genetic distance ( $d$ , left) or selection pressures ( $d_N/d_S$  ratio, right) for those species with no available information on mRNA abundance. Upper panel represents the correlation between relative gene position and  $d$  considering all the *Mononegavirales* species together. Coding regions are represented by blue diamonds, and non-coding regions by green squares. Grey dots indicate outlier values. Values are the mean  $\pm$  Standard Deviation for each data set. Note the different scale in each panel.
